## Leadless pacemaker implant in patients with a history of open heart surgery: experience with the Micra transcatheter pacemaker

C. Garweg<sup>1</sup>, S. Iacopino<sup>2</sup>, M.F. El-Chami<sup>3</sup>, C. Veltmann<sup>4</sup>, N. Clementy<sup>5</sup>, E. Grubman<sup>6</sup>, J.B. Johansen<sup>7</sup>, R. Knops<sup>8</sup>, M.J. Schalij<sup>9</sup>, J.P. Piccini<sup>10</sup>, K. Soejima<sup>11</sup>, K. Stromberg<sup>12</sup>, D.H. Fagan<sup>12</sup>, P.R. Roberts<sup>13</sup>

<sup>1</sup>University Hospitals (UZ) Leuven, Cardiology, Leuven, Belgium; <sup>2</sup>Maria Cecilia Hospital, Cotignola, Italy; <sup>3</sup>Emory University, Atlanta, United States of America; <sup>4</sup>Hannover Medical School, Hannover, Germany; <sup>5</sup>University Hospital of Tours, Tours, France; <sup>6</sup>Yale University, New Haven, United States of America; <sup>7</sup>Odense University Hospital, Odense, Denmark; <sup>8</sup>Academic Medical Center, Amsterdam, Netherlands (The); <sup>9</sup>Leiden University Medical Center, Leiden, Netherlands (The); <sup>10</sup>Duke University Medical Center, Durham, United States of America; <sup>11</sup>Kyorin University School of Medicine, Tokyo, Japan; <sup>12</sup>Medtronic, Mounds View, United States of America; <sup>13</sup>University Hospital Southampton NHS Foundation Trust, Southampton, United Kingdom

**Funding Acknowledgement:** Type of funding source: Private company. Main funding source(s): Medtronic, Inc.

**Background:** The Micra transcatheter pacemaker has demonstrated a favorable safety and efficacy profile relative to transvenous pacing. Patients with a history of open heart surgery have a higher risk of complications with transvenous pacemakers during follow-up. The experience with leadless pacemakers among a large cohort of patients with a history of open heart surgery has not been reported.

**Objective:** To report outcomes in patients with a history of open heart surgery undergoing Micra implant.

**Methods:** Patients undergoing Micra implant from the Micra Transcatheter Pacing Post-Approval Registry (PAR) were included in the analysis. Baseline and procedural characteristics, major complications, and electrical performance were compared among patients with vs. without history of cardiac surgery.

**Results:** A total of 331 out of 1815 (18.2%) patients had a history of open heart surgery, underwent Micra implant, and were followed for 19.4±10.4 months. The mean age was 74.6±13.5 years, 40% were female. The most common cardiac surgery was aortic valve surgery (71%) followed by mitral valve surgery (39%). Patients with prior open-heart surgery were more

likely to have contraindications to transvenous pacing, were more likely to be on oral anticoagulants, and had more co-morbidities including atrial fibrillation, heart failure, and coronary artery disease (all  $p < 0.005$ ). Implantation was successful in 327 of 331 patients (98.8%) with a median procedure time of 29 minutes. Mean pacing capture thresholds (PCTs) at implant were  $0.66 \pm 0.51V$  and remained stable through follow-up. There were 11 major complications in 10 cardiac surgery patients, with no device or procedure-related infections reported. The major complication rate was 3.1% (Figure) and was not significantly different than that of patients without a history of open heart surgery (HR: 0.85,  $P=0.640$ ). There was 1 cardiac perforation (with no intervention required) in the open heart surgery group (0.3%) and there were 14 cardiac perforations (0.94%,  $P=0.332$ ) in the non-open heart surgery group of which 10 required intervention.

**Conclusion:** The Micra transcatheter pacemaker can be safely implanted in patients with a history of open heart surgery, with a similar long-term safety profile to patients without a history of open heart surgery. Importantly, there were no device-related infections reported in either group.

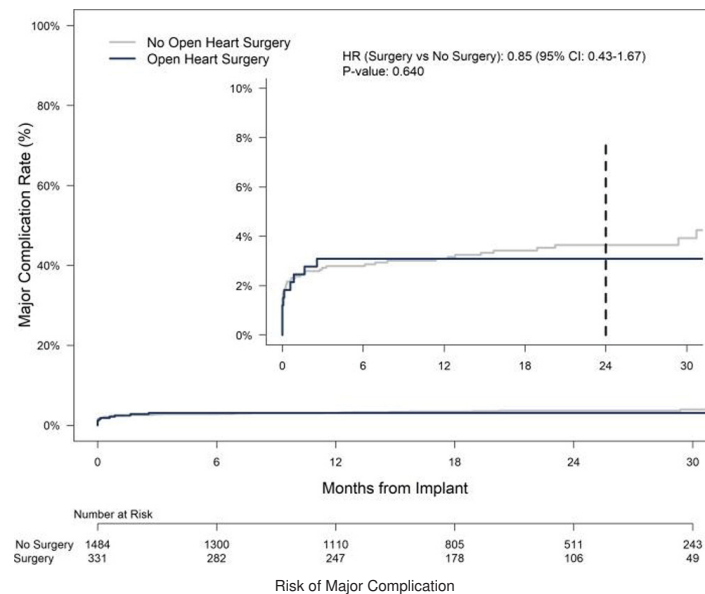

Source: http://academic.oup.com/eurheartj/article-pdf/41/Supplement_2/ehaa946.0773/34512535/ehaa946.0773.pdf
